# Supplementary material
Source: publisher figshare collection journal article supplement (https://sage.figshare.com/ndownloader/files/22661159)
Supplement: Supplementary file 1 [file 22661159]

**WEB APPENDICES**

**Web Appendix A: Example CM Campaign (Donation Frame: Minimum Amount)**


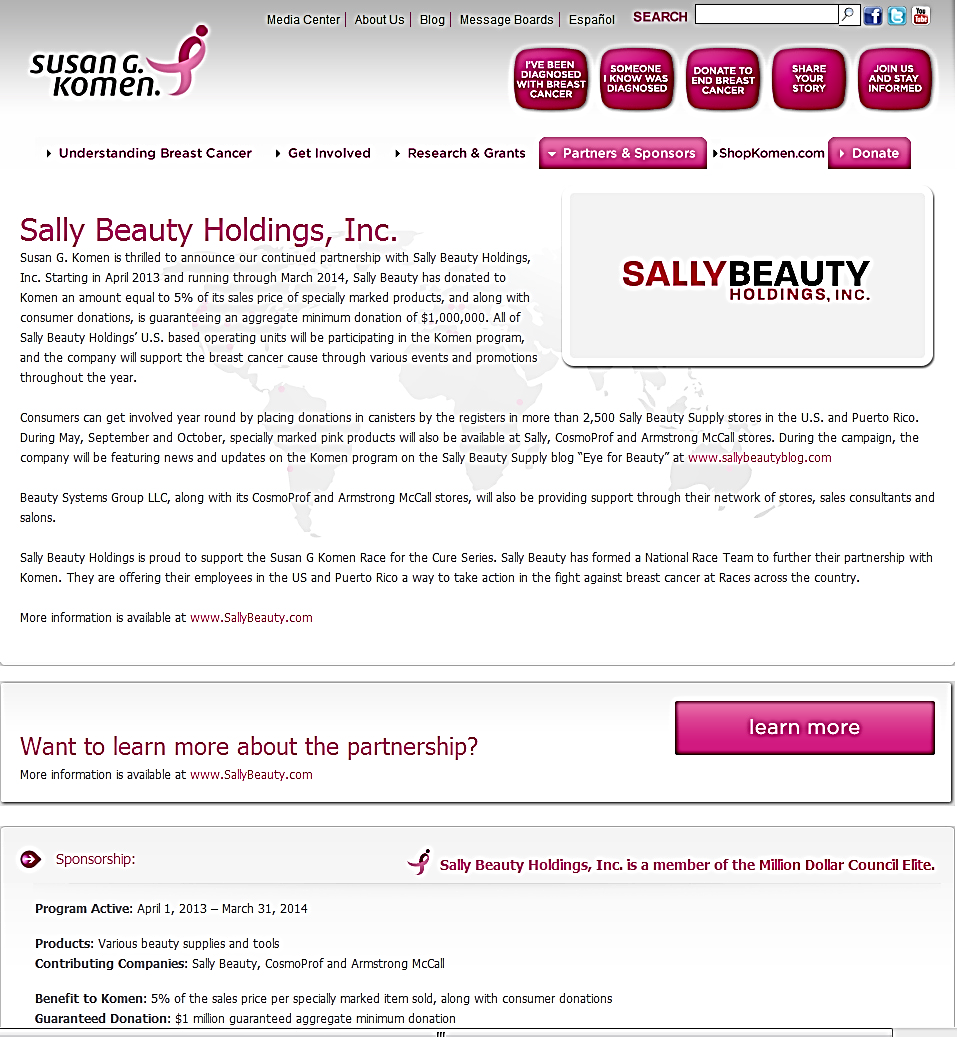


**Example CM Campaign (Donation Frame: Maximum Amount)**

**Web Appendix B: Study 1 (Condition: Maximum, Low Amount)**


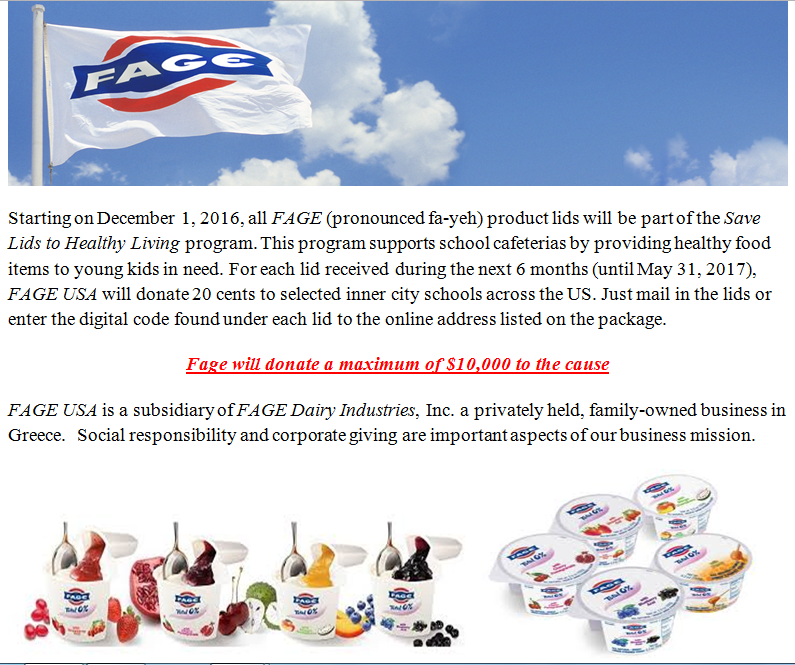


**WEB APPENDIX C: Follow-up Study to Study 1:**

*Method*

One hundred and eighty-one participants from Amazon’s Mechanical Turk’s online panel participated in the second study for a nominal payment. The study employed a 2 (Total Donation amount: $10K vs. $10M) x 2 (Donation frame: minimum vs. maximum) between-subjects design. The procedure was same as study 1, with two exceptions. First, given the purpose of the study, we did not include a control condition. Second, we asked participants to estimate how much money the campaign would raise with an open-ended question. We expected participants in the minimum donation frame condition to be more likely to purchase the product if they think the campaign would raise more than the stated donation amount. Conversely, in the maximum donation frame condition, purchase intentions should be lower when participants estimate that the campaign will raise more than the donation amount advertised in the campaign. Therefore, we created a new variable which we called “reach”, which was coded as 1 (0) if the campaign was estimated to raise more (less) than the total donation amount stated in the campaign.

*Results and Discussion*

*Purchase intentions*. We first conducted an ANOVA with purchase intentions as the dependent variable and donation amount and frame as the independent variables. The results revealed a significant two-way interaction of donation amount and frame (F(1, 177) = 5.94, *p* < .05, η2 = .032); no other effects were significant (all *p* > .43). Follow-up contrast analyses showed that, as expected, in the minimum-frame condition, a low donation amount led to greater purchase intentions (M10K = 5.44, SD = 1.30, M10M = 4.78, SD = 1.70, F(1, 177) = 4.03, *p* < .05, η2 = .022); in contrast, in the maximum-frame condition purchase intentions did not vary with donation amount (M10K = 4.70, SD = 1.87, M10M = 5.16, SD = 1.28, F(1, 177) = 2.05, *p* = .15, η2 = .011). Thus, H1 was partially supported.

*Moderating role of reaching the donation amount*. Next, we replaced the donation amount factor with the reach factor in the ANOVA model. As expected, donation amount and reach were significantly correlated (*r* = .57, *p* < .001)[[1]](#footnote-1). An ANOVA with reach and donation frame as the independent variables and purchase intentions as the dependent variable showed a significant interaction effect of reach and donation frame (F(1, 177) = 5.51, *p* < .05, η2 = .030); all other effects were non-significant (all *p* > .18). Follow-up analyses showed that in the minimum donation frame condition purchase intentions were greater when the campaign was estimated to go over the donation amount versus when it was not (Mreach = 5.38, SD = 1.52; Mnot-reach = 4.50, SD = 1.45, F(1, 177) = 6.21, *p* < .05, η2 = .034). In contrast, in the maximum donation frame condition purchase intentions did not significantly change when the campaign was estimated to fail to reach the donation amount versus when it was estimated to reach the donation amount (Mreach = 4.82, SD = 1.85; Mnot-reach = 5.06, SD = 1.31, F(1, 177) = .56, *p* = .46). These results are in line with our theory. In the minimum frame condition, as the campaign surpasses the promoted donation amount, consumers were more willing to participate in the campaign as doing so gives them a chance to personally contribute to the cause. On the other hand, in the maximum frame condition, reaching the donation amount hinders participants to personally contribute to the cause as after the campaign reaches the maximum amount, no donation will be made to the cause.

**Donation Amount**

**Web Appendix D: Study 2 Stimulus (Condition: Minimum High Donation)**


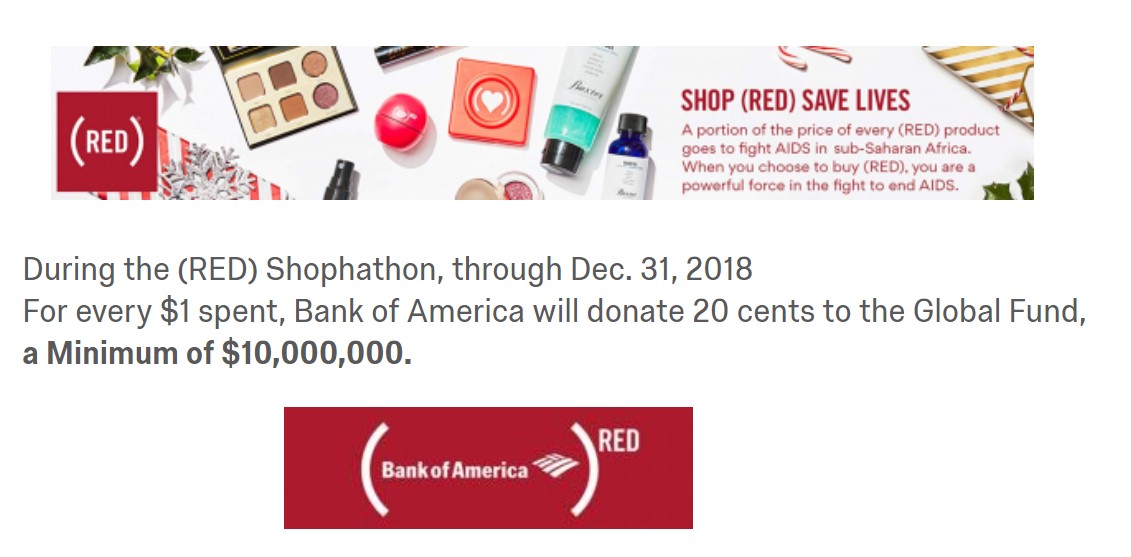


**Web Appendix E: Study 3 (Condition: Minimum, Low Amount)**

**Web Appendix F: Study 4 List of Charities:**


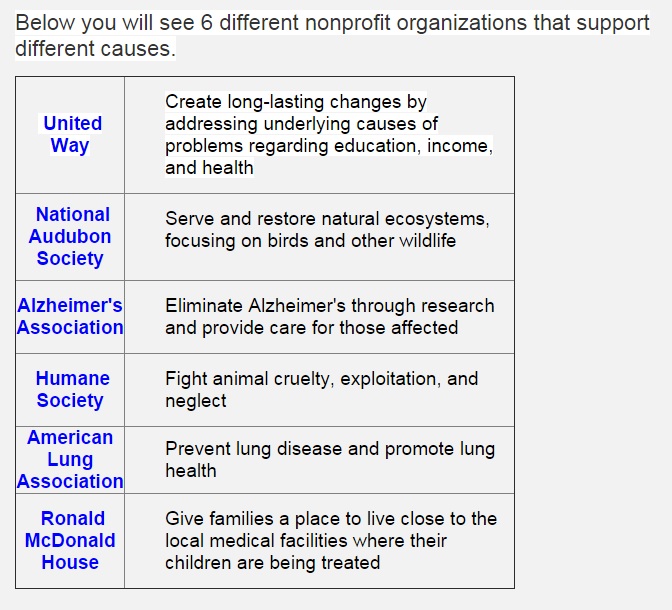


**WEB APPENDIX G: Other measures in the studies and related analyses that are not reported in the manuscript**

***Study 1:***

**Other Measures:**

**Genuine concern perceptions:**

To what extent do you think Fage's support for the cause is driven by its genuine concern for the cause?” (1 = not at all, 7 = completely)

“In general, how familiar are you with yogurt?”

(1 = not at all familiar, 7 = Very familiar)

“How often do you eat yogurt?”

(1 = Never, 7 = Frequently)

**Independent Variables: donation amount, donation frame**

**Dependent Variable: genuine concern perceptions**

Only a significant main effect of donation amount (F(1, 169) = 4.46, p < .05), indicating that a high donation amount CM campaign led to greater genuine concern perceptions (M$10M = 4.38) than the one with a low donation amount (M$10K = 3.88). All other effects, including the interaction effect, were non-significant (all p > .56).

**Results with genuine concern perceptions as a covariate in the model:**

**Independent Variables: donation amount, donation frame**

**Dependent Variable: purchase intentions**

Interaction of donation amount and frame: (F(1, 169) = 4.19, p < .05); no other effects were significant (all p > .40).

Follow-up contrasts:

Minimum-frame condition:

Mlow-amount = 4.22, Mhigh-amount = 3.70, F(1, 169) = 1.79, p = .18

Maximum frame condition:

Mlow-amount = 3.40, Mhigh-amount = 4.05, F(1, 169) = 2.54, p = .11

Control vs. low-amount minimum donation condition: F(1, 169) = 2.43, p = .12

Control vs. high-amount maximum donation condition: F(1, 169) = 1.25, p = .26

**Independent Variables: donation amount, donation frame**

**Dependent Variable: attitude towards the company**

Interaction of donation amount and frame: (F(1, 169) = 7.45, p < .01); no other effects were significant (all p > .10).

Follow-up contrasts:

Minimum-frame condition:

Mlow-amount = 4.94, Mhigh-amount = 4.14, F(1, 169) = 7.19, p < .01

Maximum frame condition:

Mlow-amount = 4.01, Mhigh-amount = 4.38, F(1, 169) = 1.39, p = .24

Control vs. low-amount minimum donation condition: F(1, 169) = 4.61, p < . 05

Control vs. high-amount maximum donation condition: F(1, 169) = .08, p = .78

***Follow-up Study to Study 1:***

**Other Measures:**

**Perceived personal contribution:** “If you purchase a pack of Fage yogurt, to what extent would you feel that you have made an impact to help the cause? (1 = not at all, 7 = very much)

**Genuine concern perceptions:**

To what extent do you think Fage's support for the cause is driven by its genuine concern for the cause?” (1 = not at all, 7 = completely)

“In general, how familiar are you with yogurt?”

(1 = not at all familiar, 7 = Very familiar)

“How often do you eat yogurt?”

(1 = Never, 7 = Frequently)

**Independent Variables: donation amount, donation frame**

**Dependent Variable: genuine concern perceptions**

No significant effects (all p > .24).

**Results with genuine concern perceptions as a covariate in the model:**

**Independent Variables: donation amount, donation frame**

**Dependent Variable: purchase amount**

Interaction of donation amount and frame: (F(1, 176) = 14.11, p < .01); no other effects were significant (all p > .34).

Follow-up contrasts:

Minimum-frame condition:

Mlow-amount = 5.44, Mhigh-amount = 4.78, F(1, 176) = 10.79, p < .01

Maximum frame condition:

Mlow-amount = 4.70, Mhigh-amount = 5.16, F(1, 176) = 4.07, p < .05

**Independent Variables: donation amount, donation frame**

**Dependent Variable: perceived personal contribution**

Interaction of donation amount and frame: (F(1, 177) = 2.03, p = .16); all other effects not significant (all p > .45).

Follow-up contrasts:

Minimum-frame condition:

Mlow-amount = 5.07, Mhigh-amount = 4.80, F(1, 177) = .64, p = .42

Maximum frame condition:

Mlow-amount = 4.56, Mhigh-amount = 4.96, F(1, 177) = 1.49, p = .22

**Mediation analyses:**

The output of the process model:

Significant positive main effect of perceived personal contribution on purchase intentions (β = .63, t = 11.05, p < .001).

The direct effect was not significant (p = .46)

The conditional indirect effect for the minimum-frame condition (CI inclusive of zero [-.3150, .1067]) and maximum-frame condition (CI inclusive of zero [-.0830, .3800]) and index of moderated mediation (CI inclusive of zero [-.0769, .5626]) were not significant.

**When genuine concern perceptions were used as a covariate:**

**Independent Variables: donation amount, donation frame**

**Dependent Variable: perceived personal contribution**

Interaction of donation amount and frame: (F(1, 176) = 6.12, p < .05); all other effects not significant (all p > .57).

Follow-up contrasts:

Minimum-frame condition:

Mlow-amount = 5.07, Mhigh-amount = 4.80, F(1, 176) = 3.14, p = .078

Maximum frame condition:

Mlow-amount = 4.56, Mhigh-amount = 4.96, F(1, 176) = 3.00, p = .085

**Mediation analyses:**

The output of the process model:

Significant positive main effect of perceived personal contribution on purchase intentions (β = .63, t = 11.05, p < .001).

The direct effect was not significant (estimated coefficient = -.081, t = -.94, p > .34)

The conditional indirect effect for the minimum-frame condition (b = .1141, 95% confidence interval [CI] including zero [-.0029, .3005]) and the index of moderated mediation was significant (index = .2344, confidence interval [CI} excluding zero [.0544, .4756]).

***Study 2:***

**Other Measures:**

**Genuine concern perceptions:**

“To what extent do you believe that Bank of America is genuinely concerned about helping the cause?”

(1 = not at all, 7 = completely)

“How familiar are you with Bank of America?”

(1 = not at all, 7 = very much)

“How familiar are you with the Product (RED) Campaign?”

(1 = not at all, 7 = very much)

“How familiar are you with the Global Fund?”

(1 = not at all, 7 = very much)

**Independent Variables: donation amount, donation frame**

**Dependent Variable: genuine concern perceptions**

No significant effects (all p > .11).

**Results with genuine concern perceptions as a covariate in the model:**

**Independent Variables: donation amount, donation frame**

**Dependent Variable: purchase intentions**

Main effect of donation frame: F(1,755) = 9.17, p < .01)

Interaction of donation amount and frame: (F(1, 755) = 9.75, p < .01)

no other effects were significant (all p > .10).

Follow-up contrasts:

Minimum-frame condition:

Mlow-amount = 4.92, Mhigh-amount = 4.48, F(1, 928) = 10.68, p < .01

Maximum frame condition:

Mlow-amount = 4.22, Mhigh-amount = 4.53, F(1, 928) = .94, p = .33

***Study 4:***

**Other measures:**

**Genuine concern perceptions:**

“To what extent do you think Company X's support for the cause is driven by its genuine concern for the cause?” (1 = not at all, 7 = completely)

How often do you donate money to any cause, charity, or non-profit organization?

(1 = Every month or more, 2 = Every couple months, 3 = A few times a year, 4 = Once a year or less, 5 = Never)

How often do you volunteer to any cause, charity, or non-profit organization?

(1 = Every month or more, 2 = Every couple months, 3 = A few times a year, 4 = Once a year or less, 5 = Never)

“In general, how familiar are you with shampoo?”

(1 = Not at all familiar, 7 = Very familiar)

“How often do you use shampoo?”

(1 = Never, 7 = Frequently)

**Independent Variables: involvement, donation amount, donation frame**

**Dependent Variable: genuine concern perceptions**

Only a significant effect of involvement (F(1, 205) = 10.61, p < .01), indicating that high (vs. low) involvement led to greater perceptions of genuine concern (Mhigh-inv = 5.06, Mlow-inv= 4.31). All other effects were non-significant (all p > .37).

**Results with genuine concern perceptions as a covariate in the model:**

**Independent Variables: involvement, donation amount, donation frame**

**Dependent Variable: willingness to pay**

Significant three-way interaction of involvement, donation amount, and donation frame: (F(1, 204) = 6.26, p < .05); significant two-way interaction of donation amount and frame (F(1, 204) = 4.51, p < .05), and a main effect of involvement (F(1, 204) = 18.41, p < .0001); all other effects are non-significant (all p > .37).

Follow-up contrasts for the two-way interaction:

Minimum-frame condition:

Mlow-amount = $1.74, Mhigh-amount = $1.44, F(1, 204) = 4.25, p < .05

Maximum frame condition:

Mlow-amount = $1.60, Mhigh-amount = $1.72, F(1, 204) = .81, p = .37

In the low-involvement condition: All effects are non-significant (all p > .55).

In the high-involvement condition:

Significant two-way interaction of donation amount and frame (F(1, 104) = 8.37, p < .05); all other effects are non-significant (all p > .27).

Follow-up contrasts for the two-way interaction in the high-involvement condition:

Minimum-frame condition:

Mlow-amount = $1.99, Mhigh-amount = $1.49, F(1, 204) = 6.72, p < .05

Maximum frame condition:

Mlow-amount = $1.72, Mhigh-amount = $2.11, F(1, 204) = 4.19, p < .05

In the low-involvement condition: All effects are non-significant (all p > .62).

1. While reach was also correlated with donation frame (r = - .20 , p < .01), multicollinearity did not seem to be an important concern. Specifically, when we regressed purchase intentions on donation frame, reach, and their interaction all variance inflation factors were close to 1 (1.08, 1.05, and 1.04, for the three factors respectively), indicating only a modest correlation between the factors. Further, the largest condition index was 1.46. [↑](#footnote-ref-1)
